# Supplementary material for: Early Notice Pointer, an IoT-like Platform for Point-of-Care Feet and Body Balance Screening
Source: MDPI journal article supplement (doi:10.3390/mi13050682), 2022-04-27
Supplement: s1 [file s1]

## Supplementary Materials

**Figure S1:** The workflow of ENP to explain the feedback loops for measurement consistency

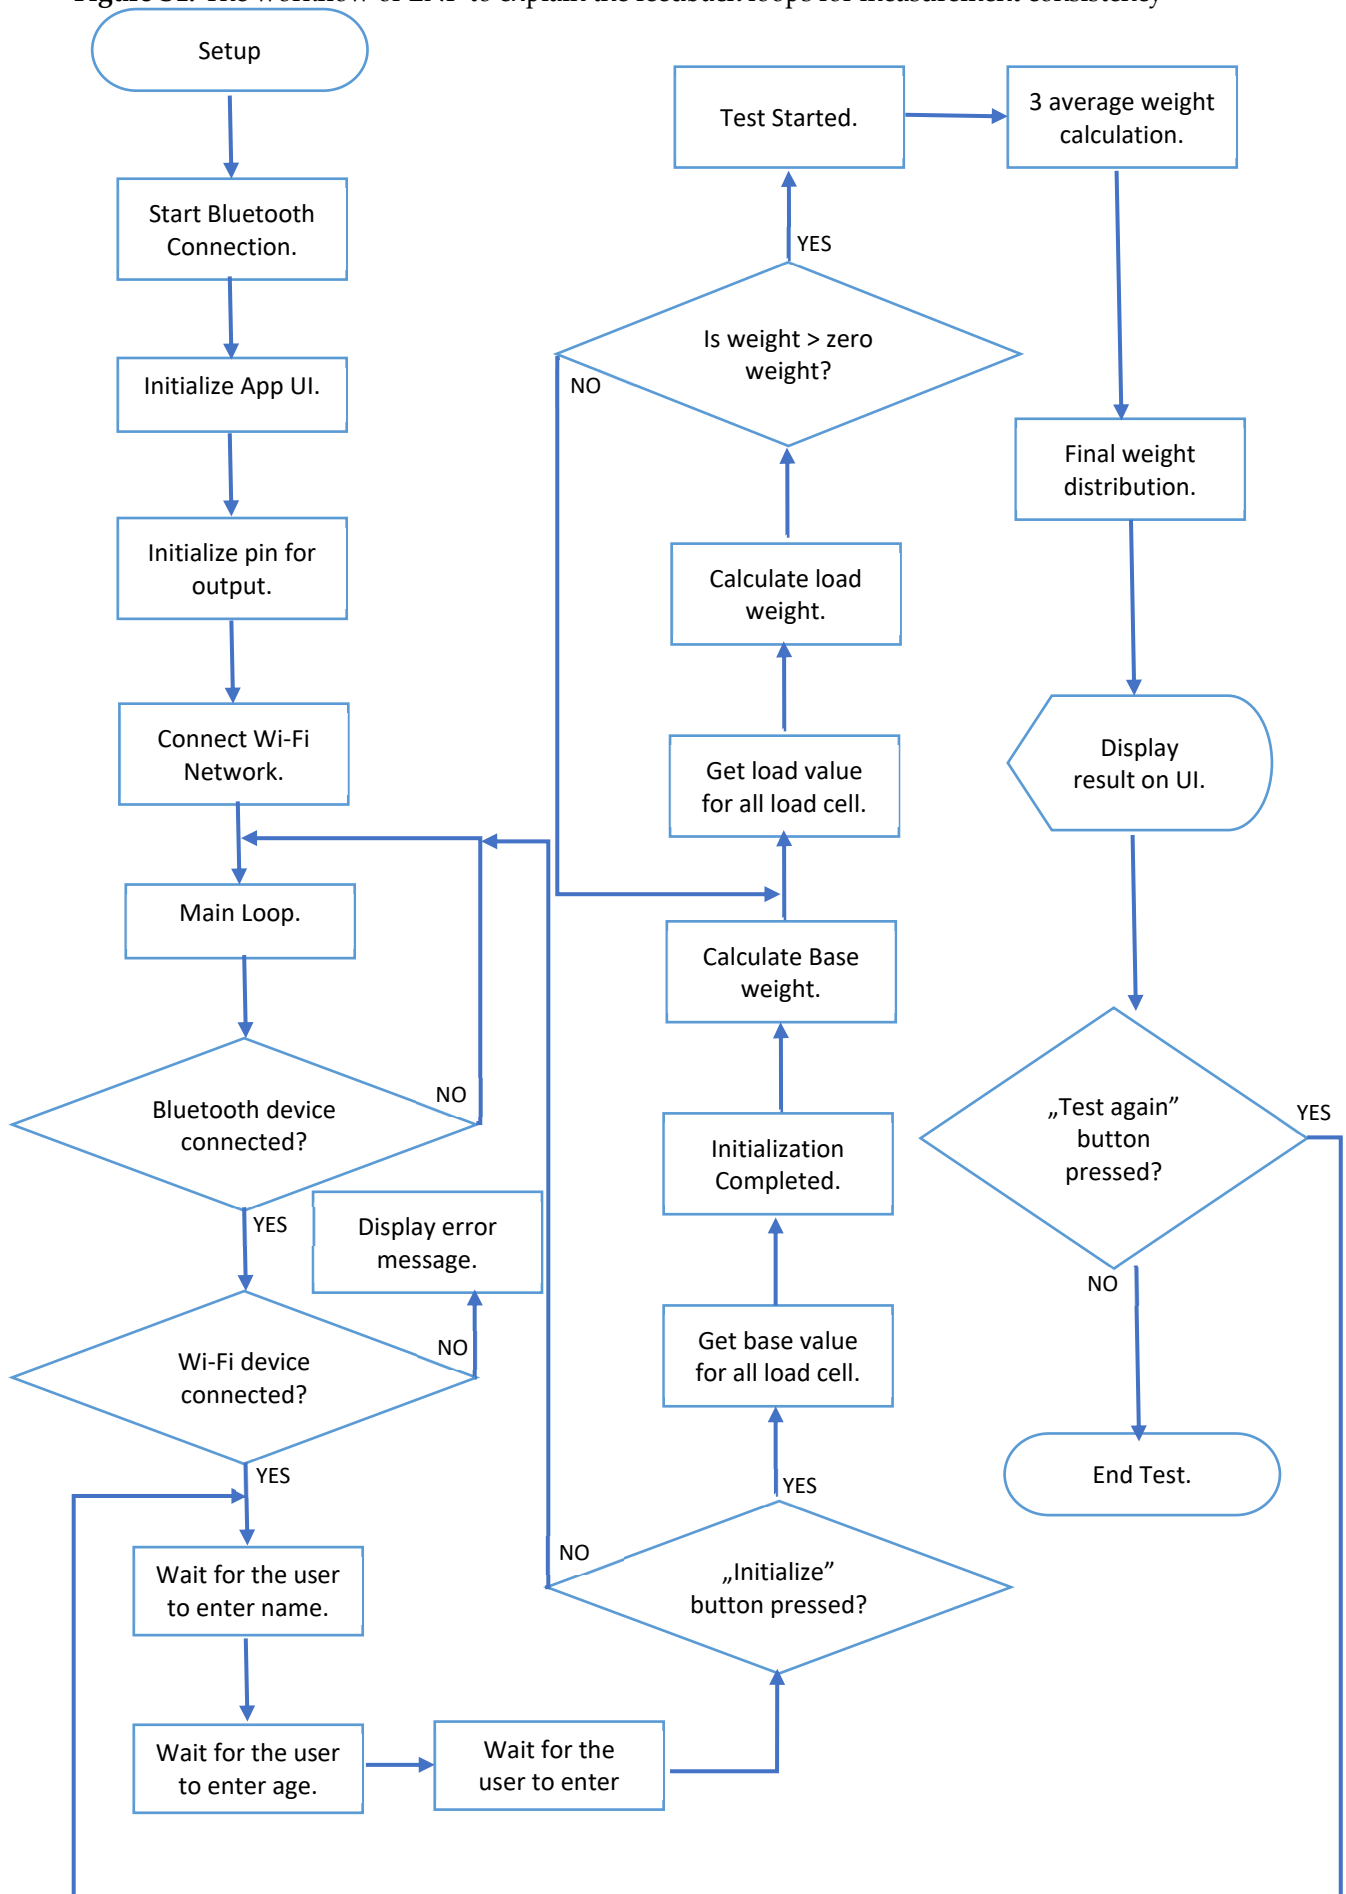

**Figure S2:** The workflow of ENP to explain the feedback loops to users

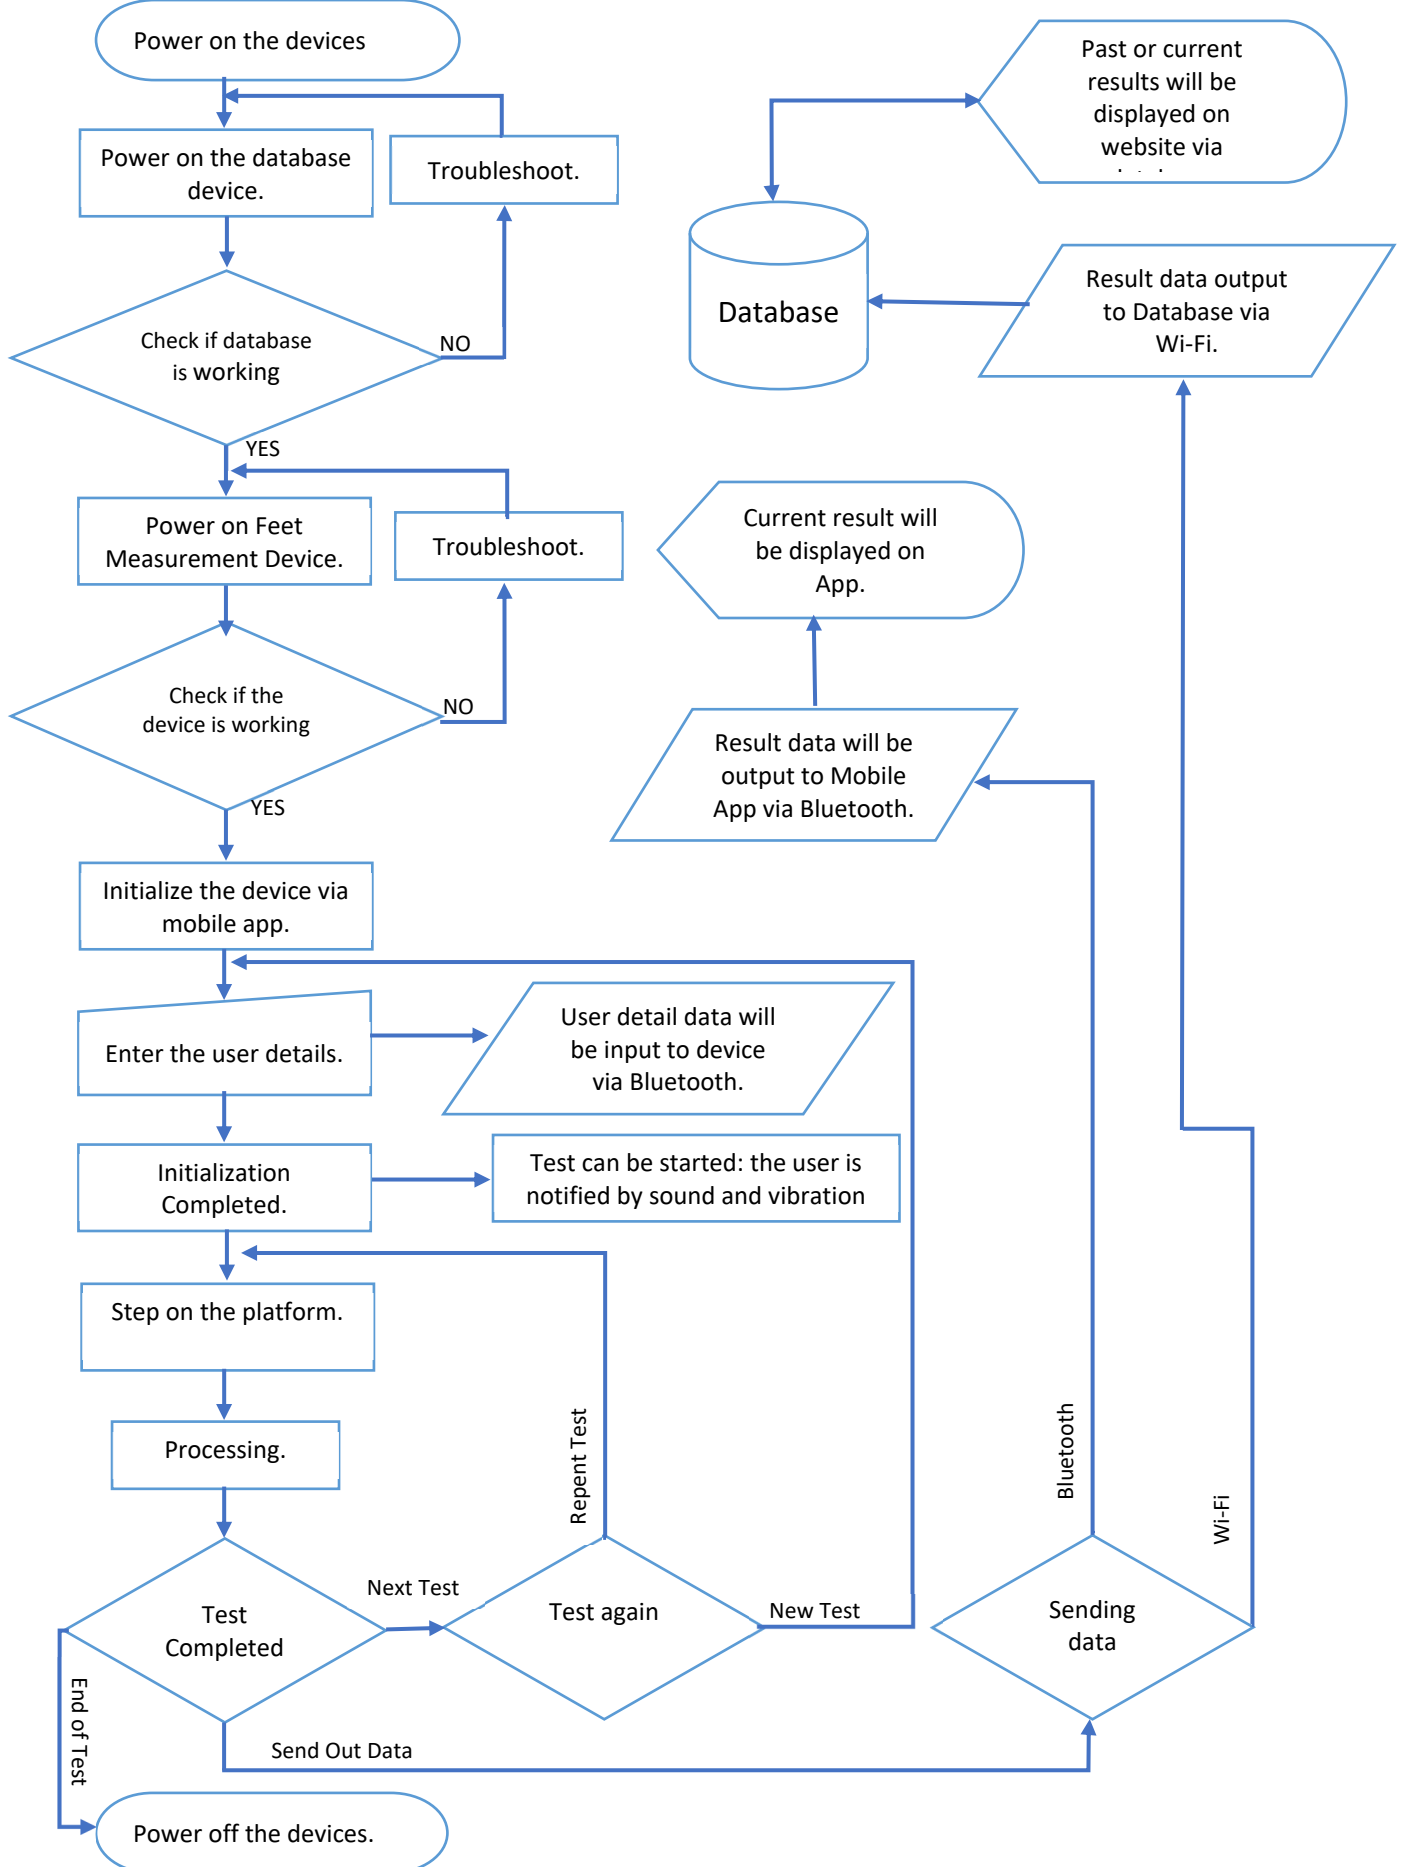

**Table S1:** The T-test results to indicate differences between the data acquired with the prototype and the foot scanners.

| Test Matscan vs. Prototype   | Left     | Right    | Left forefoot | Left rearfoot | Right forefoot | Right rearfoot |
|------------------------------|----------|----------|---------------|---------------|----------------|----------------|
| T-Test (test1&2) 2tail type1 | 7.00E-32 | 9.96E-31 | 2.00E-15      | 5.81E-16      | 6.60E-12       | 2.00E-15       |
| T-Test (test1&2) 2tail type2 | 6.00E-50 | 1.32E-47 | 2.00E-23      | 1.29E-21      | 1.50E-15       | 2.02E-23       |
| T-Test (test1&2) 2tail type3 | 3.00E-47 | 3.39E-45 | 5.00E-18      | 6.32E-19      | 2.00E-12       | 7.32E-19       |
| RS FootScan vs. Prototype    |          |          |               |               |                |                |
| T-Test (test1&2) 2tail type1 | 3.38E-01 | 3.36E-01 | 1.25E-01      | 3.44E-01      | 1.15E-11       | 1.87E-09       |
| T-Test (test1&2) 2tail type2 | 3.59E-01 | 3.57E-01 | 1.77E-01      | 3.60E-01      | 4.98E-09       | 5.62E-07       |
| T-Test (test1&2) 2tail type3 | 3.59E-01 | 3.57E-01 | 1.77E-01      | 3.60E-01      | 5.02E-09       | 5.57E-07       |
